# Supplementary material for: Transcriptome analysis of diploid and triploid Populus tomentosa
Source: PeerJ. 2020 Oct 28;8:e10204. doi: 10.7717/peerj.10204 (PMC7602689; doi:10.7717/peerj.10204)
Supplement: Supplemental Information 4 [file peerj-08-10204-s004.xls]

## Sheet: Original data
Hole position	Test item	Dye	CT	Average CT value	Sample
B04	SAUR	SYBR	30.21	30.64	DP
B05	SAUR	SYBR	30.32	30.64	DP
B06	SAUR	SYBR	31.38	30.64	DP
B10	SAUR	SYBR	32.76	32.32	TP
B11	SAUR	SYBR	32.82	32.32	TP
B12	SAUR	SYBR	32.39	32.32	TP
C01	ALDH	SYBR		0	DP
C02	ALDH	SYBR		0	DP
C03	ALDH	SYBR		0	DP
C07	ALDH	SYBR	35.35	35.75	TP
C08	ALDH	SYBR	35.75	35.75	TP
C09	ALDH	SYBR	35.95	35.75	TP
C04	NC	SYBR	25.26	25.65	DP
C05	NC	SYBR	25.87	25.65	DP
C06	NC	SYBR	25.81	25.65	DP
C10	NC	SYBR	21.25	21.01	TP
C11	NC	SYBR	20.94	21.01	TP
C12	NC	SYBR	20.85	21.01	TP
E01	GH3	SYBR		0	DP
E02	GH3	SYBR		0	DP
E03	GH3	SYBR		0	DP
E07	GH3	SYBR		0	TP
E08	GH3	SYBR		0	TP
E09	GH3	SYBR		0	TP
B01	FDP	SYBR	30.19	30.69	DP
B02	FDP	SYBR	30.03	30.69	DP
B03	FDP	SYBR	30.87	30.69	DP
B07	FDP	SYBR	33.24	33.17	TP
B08	FDP	SYBR	33.1	33.17	TP
B09	FDP	SYBR	33.17	33.17	TP
G01	CYCD3	SYBR		0	DP
G02	CYCD3	SYBR		0	DP
G03	CYCD3	SYBR		0	DP
G07	CYCD3	SYBR	34.12	34.52	TP
G08	CYCD3	SYBR	34.22	34.52	TP
G09	CYCD3	SYBR	34.32	34.52	TP
A01	CA	SYBR		0	DP
A02	CA	SYBR		0	DP
A03	CA	SYBR		0	DP
A07	CA	SYBR		0	TP
A08	CA	SYBR		0	TP
A09	CA	SYBR		0	TP
D01	AUX1	SYBR	31.24	31.63	DP
D02	AUX1	SYBR	31.92	31.63	DP
D03	AUX1	SYBR	31.72	31.63	DP
D07	AUX1	SYBR	25.1	25.08	TP
D08	AUX1	SYBR	25.12	25.08	TP
D09	AUX1	SYBR	25.02	25.08	TP
A04	MDH	SYBR	30.56	30.52	DP
A05	MDH	SYBR	30.73	30.52	DP
A06	MDH	SYBR	30.28	30.52	DP
A10	MDH	SYBR	28.17	27.64	TP
A11	MDH	SYBR	27.33	27.64	TP
A12	MDH	SYBR	27.44	27.64	TP
H01	ABF	SYBR	33.14	32.97	DP
H02	ABF	SYBR	32.73	32.97	DP
H03	ABF	SYBR	33.04	32.97	DP
H07	ABF	SYBR	34.56	34.12	TP
H08	ABF	SYBR	34.12	34.12	TP
H09	ABF	SYBR	33.67	34.12	TP
F01	A-ARR	SYBR		0	DP
F02	A-ARR	SYBR		0	DP
F03	A-ARR	SYBR		0	DP
F07	A-ARR	SYBR		0	TP
F08	A-ARR	SYBR		0	TP
F09	A-ARR	SYBR		0	TP

## Sheet: Calculation of original data 
gene name	Sample Name	Ct	EF1α Ct	△Ct	Mean △Ct	-ΔΔCt	Expression(2-ΔΔCt)	Mean Expression(2-ΔΔCt)	STDEV
SAUR	DP	30.21	25.65	4.56		10.11	1105.13
SAUR	DP	30.32	25.65	4.67		10	1024	873.424	333.541
SAUR	DP	31.38	25.65	5.73		8.94	491.143
SAUR	TP	32.76	21.01	11.75		2.92	7.56846
SAUR	TP	32.82	21.01	11.81		2.86	7.26015	8.20325	1.37515
SAUR	TP	32.39	21.01	11.38		3.29	9.78112
MDH	DP		25.65
MDH	DP		25.65					0	0
MDH	DP		25.65
MDH	TP	35.35	21.01	14.34		0.33	1.25701
MDH	TP	35.75	21.01	14.74	14.6733	-0.07	0.952638	1.01299	0.220142
MDH	TP	35.95	21.01	14.94		-0.27	0.82932
FDP	DP	30.19	25.65	4.54		10.13	1120.56
FDP	DP	30.03	25.65	4.38		10.29	1251.98	1023.98	288.667
FDP	DP	30.87	25.65	5.22		9.45	699.413
FDP	TP	33.24	21.01	12.23		2.44	5.42642
FDP	TP	33.1	21.01	12.09		2.58	5.9794	5.70067	0.276517
FDP	TP	33.17	21.01	12.16		2.51	5.6962
CYCD3	DP		25.65
CYCD3	DP		25.65					0	0
CYCD3	DP		25.65
CYCD3	TP	34.12	21.01	13.11		1.56	2.94854
CYCD3	TP	34.22	21.01	13.21		1.46	2.75108	2.75549	0.190881
CYCD3	TP	34.32	21.01	13.31		1.36	2.56685
AUX1	DP	31.24	25.65	5.59		9.08	541.193
AUX1	DP	31.92	25.65	6.27		8.4	337.794	422.337	105.952
AUX1	DP	31.72	25.65	6.07		8.6	388.023
AUX1	TP	25.1	21.01	4.09		10.58	1530.73
AUX1	TP	25.12	21.01	4.11		10.56	1509.65	1552.79	57.4487
AUX1	TP	25.02	21.01	4.01		10.66	1618
ALDH	DP	30.56	25.65	4.91		9.76	867.067
ALDH	DP	30.73	25.65	5.08		9.59	770.686	896.847	143.39
ALDH	DP	30.28	25.65	4.63		10.04	1052.79
ALDH	TP	28.17	21.01	7.16		7.51	182.278
ALDH	TP	27.33	21.01	6.32		8.35	326.288	270.3	77.1641
ALDH	TP	27.44	21.01	6.43		8.24	302.334
ABF	DP	33.14	25.65	7.49		7.18	145.009
ABF	DP	32.73	25.65	7.08		7.59	192.672	164.366	25.0597
ABF	DP	33.04	25.65	7.39		7.28	155.417
ABF	TP	34.56	21.01	13.55		1.12	2.17347
ABF	TP	34.12	21.01	13.11		1.56	2.94854	3.04994	0.931326
ABF	TP	33.67	21.01	12.66		2.01	4.02782

## Sheet: Chart
gene name	Sample Name	Mean Expression(2-ΔΔCt)	STDEV
SAUR	DP	873.424	333.541
SAUR	TP	8.20325	1.37515
MDH	DP	0	0
MDH	TP	1.01299	0.220142
FDP	DP	1023.98	288.667
FDP	TP	5.70067	0.276517
CYCD3	DP	0	0
CYCD3	TP	2.75549	0.190881
AUX1	DP	422.337	105.952
AUX1	TP	1552.79	57.4487
ALDH	DP	896.847	143.39
ALDH	TP	270.3	77.1641
ABF	DP	164.366	25.0597
ABF	TP	3.04994	0.931326
